# Supplementary material for: Visual Blood, Visualisation of Blood Gas Analysis in Virtual Reality, Leads to More Correct Diagnoses: A Computer-Based, Multicentre, Simulation Study
Source: MDPI journal article supplement (doi:10.3390/bioengineering10030340), 2023-03-08
Supplement: s1 [file s1]

**Table S1.** Overview of all scenarios with the respective deranged and normal parameters. Orange: too low; green: safe; purple: too high.

| Scenario           | 1                            | 2                          | 3                                    | 4                  | 5                               | 6          |
|--------------------|------------------------------|----------------------------|--------------------------------------|--------------------|---------------------------------|------------|
| Clinical diagnosis | Anaemia with lactic acidosis | Acute respiratory acidosis | Metabolic acidosis in hyperglycaemia | Methaemoglobinemia | Hypokalaemia and hypernatraemia | Hypoxaemia |
| <b>Value</b>       |                              |                            |                                      |                    |                                 |            |
| pH                 | Orange                       | Orange                     | Orange                               | Green              | Green                           | Green      |
| pCO <sub>2</sub>   | Green                        | Purple                     | Orange                               | Green              | Green                           | Green      |
| pO <sub>2</sub>    | Purple                       | Green                      | Green                                | Green              | Green                           | Orange     |
| P50                | Purple                       | Purple                     | Purple                               | Orange             | Green                           | Green      |
| sO <sub>2</sub>    | Green                        | Green                      | Green                                | Green              | Green                           | Orange     |
| Haemoglobin        | Orange                       | Green                      | Green                                | Green              | Green                           | Green      |
| COHb               | Green                        | Green                      | Green                                | Green              | Green                           | Green      |
| MetHb              | Green                        | Green                      | Green                                | Purple             | Green                           | Green      |
| Potassium          | Green                        | Green                      | Green                                | Green              | Orange                          | Green      |
| Sodium             | Green                        | Green                      | Green                                | Green              | Purple                          | Green      |
| Chloride           | Green                        | Green                      | Green                                | Green              | Green                           | Green      |
| Calcium            | Green                        | Green                      | Green                                | Green              | Green                           | Green      |
| Anion gap          | Purple                       | Green                      | Purple                               | Green              | Green                           | Green      |
| Lactate            | Purple                       | Green                      | Purple                               | Green              | Green                           | Green      |
| Glucose            | Green                        | Green                      | Purple                               | Green              | Green                           | Green      |
| Osmolality         | Green                        | Green                      | Purple                               | Green              | Green                           | Green      |
| Base excess        | Orange                       | Green                      | Orange                               | Green              | Green                           | Green      |
| Bicarbonate        | Orange                       | Green                      | Orange                               | Green              | Green                           | Green      |

Abbreviations: pCO<sub>2</sub>: partial pressure of carbon dioxide; pO<sub>2</sub>: partial pressure of oxygen; sO<sub>2</sub>: oxygen saturation; COHb: carboxyhaemoglobin; MetHb: methaemoglobin.
